## The Effect of Convalescent Plasma Therapy on COVID-19 Patient Mortality: Systematic Review and Meta-analysis

Stephen A. Klassen, PhD<sup>1†</sup>, Jonathon W. Senefeld, PhD<sup>1†</sup>, Patrick W. Johnson, BSc<sup>2</sup>, Rickey E. Carter, PhD<sup>2</sup>, Chad C. Wiggins, PhD<sup>1</sup>, Shmuel Shoham, MD<sup>3</sup>, Brenda J. Grossman, MD<sup>4</sup>, Jeffrey P. Henderson, MD, PhD<sup>5,6</sup>, James Musser, MD, PhD<sup>7,8,9</sup>, Eric Salazar, MD, PhD<sup>7,9</sup>, William R. Hartman, MD<sup>10</sup>, Nicole M. Bouvier, MD<sup>11,12</sup>, Sean T. H. Liu, MD, PhD<sup>11,12</sup>, Liise-anne Pirofski, MD<sup>13</sup>, Sarah E. Baker, PhD<sup>1</sup>, Noud van Helmond, MD<sup>14</sup>, R. Scott Wright, MD<sup>15,16</sup>, DeLisa Fairweather, PhD<sup>17</sup>, Katelyn A. Bruno, PhD<sup>17</sup>, Zhen Wang, PhD<sup>18</sup>, Nigel S. Paneth, MD<sup>19,20</sup>, Arturo Casadevall, MD, PhD<sup>21 †</sup>, and Michael J. Joyner, MD<sup>1 †\*</sup>

### Affiliations:

<sup>1</sup>Department of Anesthesiology and Perioperative Medicine, Mayo Clinic, Rochester, Minnesota,

<sup>2</sup>Department of Health Sciences Research, Mayo Clinic, Jacksonville, Florida,

<sup>3</sup>Division of Infectious Diseases, Johns Hopkins University School of Medicine, Baltimore, Maryland,

<sup>4</sup>Department of Pathology and Immunology, Washington University School of Medicine in St. Louis, St. Louis, Missouri,

<sup>5</sup>Division of Infectious Diseases, Department of Medicine and <sup>6</sup>Department of Molecular Microbiology, Washington University School of Medicine in St. Louis, St. Louis, Missouri, USA.

<sup>7</sup>Department of Pathology and Genomic Medicine, Houston Methodist Hospital, Houston, Texas

<sup>8</sup>Center for Molecular and Translational Human Infectious Diseases, Houston Methodist Research Institute, Houston, Texas

<sup>9</sup>Department of Pathology and Laboratory Medicine, Weill Cornell Medical College, New York, New York

<sup>10</sup>Department of Anesthesiology, University of Wisconsin-Madison School of Medicine and Public Health

<sup>11</sup>Division of Infectious Diseases, Department of Medicine and <sup>12</sup>Department of Microbiology, Icahn School of Medicine at Mount Sinai, New York, New York

<sup>13</sup>Division of Infectious Diseases, Department of Medicine, Albert Einstein College of Medicine and Montefiore Medical Center, Bronx, New York

<sup>14</sup>Department of Anesthesiology, Cooper Medical School of Rowan University, Cooper University Health Care, Camden, New Jersey

<sup>15</sup>Department of Cardiovascular Medicine, Mayo Clinic, Rochester, Minnesota

<sup>16</sup>Director Human Research Protection Program, Mayo Clinic, Rochester, Minnesota

<sup>17</sup>Department of Cardiovascular Medicine, Mayo Clinic, Jacksonville, Florida

<sup>18</sup>Evidence-Based Practice Center, Robert D. and Patricia E. Kern Center for Science of Health Care Delivery, Mayo Clinic, Rochester, Minnesota

<sup>19</sup>Department of Epidemiology and Biostatistics and <sup>20</sup>Department of Pediatrics and Human Development, College of Human Medicine, Michigan State University, East Lansing, Michigan

<sup>21</sup>Department of Molecular Microbiology and Immunology, Johns Hopkins Bloomberg School of Public Health, Baltimore, Maryland

† Drs. Klassen, Senefeld, Casadevall, and Joyner contributed equally to this article.

### \*Correspondence:

Michael J. Joyner, M.D., Department of Anesthesiology and Perioperative Medicine

Mayo Clinic | 200 First Street SW | Rochester, MN 55905

joyner.michael@mayo.edu | 507-255-7197

## **Abstract**

To determine the effect of COVID-19 convalescent plasma on mortality, we aggregated patient outcome data from 10 randomized clinical trials (RCT), 20 matched-control studies, two dose-response studies, and 96 case-reports or case-series. Studies published between January 1, 2020 – January 16, 2021 were identified through a systematic search of online PubMed and MEDLINE databases. Random-effects analyses of RCT and matched-control data demonstrated that COVID-19 patients transfused with convalescent plasma exhibited a lower mortality rate compared to patients receiving standard treatments. Additional analyses showed that early transfusion (within 3 days of hospital admission) of higher-titer plasma is associated with lower patient mortality. These data provide evidence favoring the efficacy of human convalescent plasma as a therapeutic agent in hospitalized COVID-19 patients.

**Key Words:** Convalescent plasma, Coronavirus disease 2019 (COVID-19), Meta-analysis, Passive antibody therapy, Severe acute respiratory syndrome coronavirus 2 (SARS-CoV-2)

## Introduction

Convalescent plasma is a century-old passive antibody therapy that has been used to treat outbreaks of novel infectious diseases, including those affecting the respiratory system.<sup>1,2</sup> At the onset of the pandemic, human convalescent plasma was used world-wide as it represented the only antibody-based therapy to treat coronavirus disease 2019 (COVID-19), caused by the severe acute respiratory syndrome coronavirus 2 (SARS-CoV-2).<sup>2-5</sup> Despite the emerging availability of monoclonal antibody therapies and vaccines for use in non-hospitalized patients via federal emergency authorization routes, convalescent plasma usage has persisted (~100,000 units/month in the United States in early 2021) during subsequent waves of the COVID-19 pandemic due to surging hospitalizations and mortality rates.<sup>6-9</sup> However, evidence for therapeutic COVID-19 convalescent plasma efficacy still requires definitive support from large randomized clinical trials (RCT). As a result, there remains a lack of consensus on convalescent plasma use in hospitalized COVID-19 patients.<sup>10,11</sup> Smaller RCTs, matched-control studies, and case-series studies investigating convalescent plasma therapy for COVID-19 have emerged and provided a positive efficacy signal.<sup>12-18</sup> Most of these studies, however, lacked appropriate statistical power or were terminated early. Also, many studies have transfused patients only after clinical progression to severe COVID-19 respiratory distress, which opposes historical data highlighting the efficacy of early convalescent plasma transfusion and overlooks viral neutralization as the fundamental mechanism for convalescent plasma therapy.<sup>1,2</sup>

There is an urgent need to determine the efficacy of potential treatments amidst the ongoing COVID-19 pandemic. Although a 'living' systematic review has summarized a broad-ranging clinical experience with convalescent plasma,<sup>10,11</sup> this approach may be limited because it employed stringent inclusion criteria for aggregating patient outcomes, which prevented a preliminary assessment of convalescent plasma efficacy. Given the insufficient patient outcome data available from RCTs, we used a pragmatic approach for study selection to aggregate COVID-19 clinical outcomes, focusing solely on mortality data from RCTs, matched-control studies, dose-response investigations, and case-series or case reports in real time. Our primary objective was to derive an aggregate estimate of the mortality rates from transfused and non-transfused cohorts of contemporaneous COVID-19 studies. As an exploratory objective, we assessed whether the time from hospital admission to convalescent plasma transfusion was associated with patient mortality.

## Methods

### *Eligibility*

We included RCTs, matched-control trials, dose-response studies, and case-series or case-reports published on pre-print servers or peer-reviewed journals that investigated the impact of human convalescent plasma therapy on COVID-19 patient mortality.

### *Literature Search and Data Extraction*

We performed a systematic search of the online Pubmed and MEDLINE databases from January 1, 2020 through January 16, 2021. Keywords used in the search included:

((convalescent plasma) OR (convalescent serum)) AND COVID-19 (and medical subject headings; MeSH terms) using the following limits: Humans. No language restrictions were imposed. The references of all eligible studies were reviewed to identify other potentially eligible studies. In order to be considered eligible for inclusion, studies must have: 1) included patients with confirmed diagnosis of COVID-19, 2) used convalescent plasma treatment, and 3) reported mortality. Randomized clinical trials, matched-control studies, dose-response studies, case-series and case-reports were included. Two reviewers (S.A.K and J.W.S) independently screened the titles and abstracts of all studies identified by the search to determine eligibility. Studies that were deemed potentially eligible had their full text reviewed (S.A.K and J.W.S) in order to determine if they met the criteria for inclusion in the review. Disagreement was resolved by consensus. Two reviewers (S.A.K and J.W.S) extracted study and patient characteristics as well as clinical information (variables delineated in **Supplemental Tables S4, S5, S6**).

Two reviewers (S.A.K and J.W.S) independently assessed the risk of bias for mortality data of each included study using the Cochrane Risk of Bias criteria (for RCTs) and the Newcastle-Ottawa Scale (for matched-control studies) (**Supplement tables S1 and S2**).<sup>19–21</sup> Dose-response studies were evaluated with the Newcastle-Ottawa Scale. The criteria developed by the Mayo Clinic Evidence-Based Practice Research Program informed our assessment of bias in the mortality data reported by case-series and case-reports.<sup>22</sup>

### *Data Synthesis*

For RCTs and matched-control studies, we recorded the number of survivors and non-survivors in transfused and non-transfused cohorts to calculate odds ratios with 95% confidence intervals. For dose-response studies, we recorded the number of survivors and non-survivors among patients who were transfused with higher-titer and lower-titer convalescent plasma unit subgroups to calculate odds ratios with 95% confidence intervals. Aggregate mortality rates were calculated for transfused and, if applicable, non-transfused patients at the longest reported vital status for each study.

Using the DerSimonian–Laird random-effects method<sup>23</sup> we computed aggregate odds ratios with 95% confidence intervals separately for RCTs and matched-control studies. We also computed aggregate odds ratios with 95% confidence intervals for RCTs and matched-control studies, combined. Simple random-effects meta-regression analyses evaluated the moderator variables (i.e., cohort age, proportion of cohort receiving mechanical ventilation, and duration of study follow up) on mortality for all clinical studies. The  $I^2$  statistic was used to quantify heterogeneity. Based on historical data,<sup>1</sup> we performed an exploratory subgroup analysis to assess the impact of early transfusion (within 3 days of hospital admission) compared to late transfusion (>3 days after hospital admission) on COVID-19 patient mortality. All analyses were performed with Comprehensive Meta-analysis Software (Biostat, version 3.3.070). Tests were two-tailed and alpha was 0.05. Figures were made with R software (R Core Team). The number needed to treat was calculated using aggregate data from controlled studies.<sup>24</sup> Dose-response studies, case-series and case-reports were not included in the meta-analysis but were described in a narrative.

## *Certainty of Evidence Assessment*

We used the GRADE approach to assess the certainty of evidence regarding the impact of convalescent plasma on COVID-19 patient mortality.<sup>25</sup> The risk of bias assessments for RCT and matched-control data informed our certainty of evidence assessment.

## **Results**

### ***Search Results***

The literature search yielded 780 studies, of which 128 studies met the eligibility criteria and were included in the systematic review (**Supplemental Figure S1**). The present analyses included a total of 10 RCTs,<sup>13,18,26–33</sup> 20 matched-control studies,<sup>16,34–53</sup> two dose-response studies,<sup>54,55</sup> and 96 case-series or case-reports.<sup>3,15,40,46,56–147</sup> Overall, these studies reported outcomes from 35,055 COVID-19 patients in 31 countries (**Table 1, Table 2, and Supplemental Table S3**). The age of patients enrolled in these studies ranged from 4 to 100 years, with a greater proportion of men than women in most studies (proportion of women: 0% to 100%) (**Supplemental Tables S4, S5, S6**). All studies included patients with diagnosed COVID-19, with most studies including hospitalized patients with severe or life-threatening COVID-19. At the time of plasma transfusion, the proportion of patients on mechanical ventilation varied by study from 0% to 100%. The duration of follow up ranged from 2 to 118 days (**Supplemental Tables S4, S5, S6**). In most studies, patients were eligible to receive concomitant and experimental therapies such as antivirals, steroids, and chloroquine or hydroxychloroquine.

### ***Meta-analysis***

#### *Randomized Clinical Trials*

When data from the 10 RCTs were aggregated, there was no association between convalescent plasma therapy and mortality (odds ratio [OR]: 0.76, 95% confidence interval [95% CI]: 0.54, 1.09,  $P = 0.14$ ,  $I^2 = 7\%$ ) (**Table 1 and Figure 1**). Although the heterogeneity was low, one RCT (Agarwal et al.<sup>32</sup>) demonstrated a directionally different effect, had a large statistical weight (34.2), and represented the primary source of heterogeneity ( $\Delta I^2 = 7\%$ ). Additionally, in the context of COVID-19, neutralizing antibodies are hypothesized to represent the primary active agent in convalescent plasma and the marker of plasma potency.<sup>148,149</sup> In this regard, as mentioned below, two studies report a dose-response relationship between convalescent plasma antibody level and mortality, suggesting the need for a sufficient amount of antibody for therapeutic success.<sup>148,149</sup> The Agarwal et al.<sup>32</sup> trial included a large proportion of patients (~70%) in the convalescent plasma arm whom received plasma with low levels of SARS-CoV-2 antibodies less than 1:80, with ~30% receiving plasma with no detectable antibodies.<sup>32</sup> Thus, there were strong analytical and biological rationales to exclude this study from statistical models.

When analyses were performed on data from nine RCTs excluding the Agarwal et al.<sup>32</sup> study, patients transfused with convalescent plasma exhibited a lower mortality rate compared to non-transfused COVID-19 patients (11% vs. 16% mortality; OR: 0.65, 95% CI: 0.43, 0.98,  $P = 0.04$ ,

$I^2 = 0\%$ ) (**Table 1 and Figure 1**). The aggregate OR (0.65) indicates that convalescent plasma was associated with a 35% reduction in the odds of mortality among COVID-19 patients.

#### *Matched-control studies*

When we aggregated mortality data from the 20 matched-control studies, patients transfused with convalescent plasma exhibited a lower mortality rate compared to non-transfused patients (21% vs. 29% mortality; OR: 0.57, 95% CI: 0.45, 0.72,  $P < 0.001$ ,  $I^2 = 61\%$ ) (**Table 1 and Figure 1**).

#### *Randomized Clinical Trials and Matched-control studies*

Aggregation of mortality data from all controlled studies including RCTs and matched-control studies indicated that patients transfused with convalescent plasma exhibited a 42% reduction in mortality rate compared to patients receiving standard treatments (20% vs. 28% mortality; OR: 0.58, 95% CI: 0.47, 0.71,  $P < 0.001$ ,  $I^2 = 53\%$ ) (**Table 1 and Figure 1**). Simple random-effects meta-regression analyses indicated that cohort age ( $P = 0.23$ ), proportion of cohort receiving mechanical ventilation ( $P = 0.51$ ), and duration of study follow up ( $P = 0.29$ ) did not affect the aggregate OR computed for all controlled studies.

#### *Subgroup analysis: effect of days between hospital admission and plasma transfusion*

Sixteen studies ( $n = 6$  RCTs,  $n = 10$  matched-control studies) reported the number of days between hospital admission and convalescent plasma transfusion (**Supplemental Table S4**). Exploratory analysis revealed that the mortality reduction associated with convalescent plasma transfusion was greater in studies that transfused patients within 3 days of hospital admission (OR: 0.44 95% CI: 0.32, 0.61) compared to studies that transfused patients >3 days after hospital admission (OR: 0.79 95% CI: 0.62, 0.98; Random effects test of heterogeneity between subgroups:  $P = 0.005$ ). However, this analysis was strongly influenced by the study by Altuntas and colleagues<sup>42</sup> which transfused patients >3 days after admission (relative weight: 73%). Upon removing the study by Altuntas and colleagues,<sup>42</sup> the number of days from hospital admission to transfusion no longer affected the mortality reduction associated with convalescent plasma transfusion (transfusion within 3 days of hospitalization: 0.44 [0.32, 0.60]; transfusion >3 days after hospitalization: 0.61 [0.36, 0.68]; Random effects test of heterogeneity between subgroups:  $P = 0.23$ ).

### **Additional Evidence**

#### *Dose-response studies*

Two studies investigated the association between convalescent plasma antibody levels and the risk of mortality from COVID-19.<sup>3,55</sup> Although different criteria were used to categorize convalescent plasma units as higher and lower antibody level, both studies found a dose-response association between antibody level and COVID-19 mortality, such that patient mortality was lower in the subgroups transfused with higher-titer plasma. The aggregate mortality rate of COVID-19 patients transfused with higher-titer convalescent plasma was lesser than patients transfused with lower-titer plasma (22% vs. 29% mortality).

### *Case-series and case-reports*

The aggregate mortality rate among COVID-19 patients transfused with convalescent plasma reported in uncontrolled studies was 13% (range: 0% to 100%), which is comparable to the mortality rates exhibited by transfused cohorts from clinical trials and matched-control studies (**Supplemental Table S3**). Case-series and case-report data included diverse patient cohorts with varying inherent risk for COVID-19 complications. Several studies explored immunosuppressed patients with suppressed antibody production due to hematological malignancies, cancer-directed therapy, or X-linked agammaglobulinemia (XLA) and provided an important 'experiment of nature' to evaluate convalescent plasma efficacy for COVID-19.<sup>95,127,150,151</sup> For example, Jin et al.<sup>95</sup> highlighted a series of three XLA patients with severe COVID-19 that failed to respond to other supportive treatments but demonstrated strong improvements in oxygen requirements and viral clearance within days of receiving convalescent plasma transfusions.

### *Risk of Bias*

Overall, we deemed the risk of bias for mortality data to be low-to-moderate for RCTs and low-to-moderate for matched-control studies. We present the full judgement for each study in **Supplemental Table S1 and S2**. The risk of bias for uncontrolled studies is inherently high. Visual inspection of the funnel plot to assess publication bias shows that one study falls below the 95% CI and two studies fall above the 95% CI (**Supplemental Figure S2**). The funnel plot shows symmetry in the effect sizes among studies with low standard error and asymmetry among studies with greater standard error, suggesting that smaller studies with larger standard error may be more likely to report an effect of convalescent plasma. However, Egger's regression test suggests that there is no significant asymmetry of the plot (intercept = -0.17,  $P = 0.67$ ).

### *Certainty of Evidence*

The certainty in the estimate of the effect of convalescent plasma on mortality is moderate-to-high.<sup>152</sup> This judgment was based on the consistency of the results between RCT and matched-control studies and the corroborating evidence from dose-response studies and other uncontrolled case data. When aggregating data from all controlled studies, the meta-analyses provided precise estimates, did not demonstrate substantial heterogeneity, and demonstrated no strong evidence of publication bias. The inherent limitations of the included studies rendered the certainty of evidence judgement to be moderate-to-high.

### *Number needed to treat*

Based on the aggregate OR (0.58, 95% CI: 0.47, 0.71) computed for all controlled studies and the aggregate mortality rate (28%) expressed by non-transfused cohorts among the controlled studies, in order to avoid one death the number needed to be transfused with convalescent plasma rather than only receive the standard of care is 11 (range: 8 – 16).

## Discussion

This analysis represents the most current aggregation of mortality data from contemporaneous COVID-19 convalescent plasma studies. The aggregate mortality rate of transfused COVID-19 patients was lower than that of non-transfused COVID-19 patients. Additional analyses demonstrated that early transfusion of high-titer plasma reduces mortality among patients with COVID-19. These results favor the efficacy of convalescent plasma as a COVID-19 therapeutic agent. The primary biological hypothesis for the efficacy of convalescent plasma is antibody-mediated SARS-CoV-2 viral neutralization and interference with viral replication, though other biological mechanisms may also contribute to the mitigation of symptoms.<sup>2</sup> The mortality reduction associated with convalescent plasma aligns with similar analyses of historical data from convalescent plasma trials for viral diseases such as the 1918 flu epidemic,<sup>1</sup> severe acute respiratory syndrome,<sup>153</sup> and H1N1 influenza.<sup>154</sup> Our findings are discordant with those of a previous 'living' systematic review,<sup>10,11</sup> which concluded that there was insufficient evidence to determine the impact of convalescent plasma on all-cause mortality based on only two RCTs, including one prematurely terminated RCT (Li et al.<sup>12</sup>). This discordance reflects differences in the studies included in the analysis. Our approach was pragmatic and used less stringent study inclusion criteria, allowing for the inclusion of 30 controlled studies, of which a majority found a directionally similar effect of convalescent plasma and our analyses stratified by study design (e.g., RCT and matched-control studies) revealed similar aggregate ORs.

Mechanistic and clinical data support the reduction in mortality associated with convalescent plasma administration. Importantly, convalescent plasma contains SARS-CoV-2 neutralizing antibodies.<sup>155,156</sup> Convalescent plasma administration increases SARS-CoV-2 clearance in COVID-19 patients<sup>12,34</sup> including immunocompromised individuals,<sup>95,110,121,150</sup> indicating an antiviral effect. Viral neutralization is then posited to reduce the inflammatory response and thus lessen the likelihood that an over-exuberant immune response progresses to lung damage, interference with gas exchange, and death. Additional evidence arising from animal studies shows that administration of human convalescent plasma is protective against SARS-CoV-2 infection.<sup>157,158</sup> Antibody-mediated interference with viral replication may increase tissue repair and eventually manifest as reduced mortality. In addition, convalescent plasma transfusion is associated with reductions in inflammatory markers, such as chemokines, cytokines and C-reactive protein.<sup>127,159</sup> Concomitant reductions in inflammation and improved gas exchange may underlie the reductions in oxygen requirements associated with convalescent plasma, even in critically ill patients. These findings provide mechanistic evidence for the reduction in mortality observed in patients receiving convalescent plasma.

There are several limitations to this analysis including aggregating mortality data across study populations that varied by: 1) the nation of data origin, 2) timing relative to world-wide progression of the pandemic, 3) clinical diagnostic and treatment algorithms, 4) plasma antibody titer and administration volume, 5) the latency between COVID-19 diagnosis and transfusion, and 6) the duration of follow up after transfusion. Also, we did not consult a librarian when constructing our search terms. However, high-quality evidence from large RCTs remains unavailable and the continuing global health emergency related to COVID-19 necessitated a practical real-time aggregation of existing mortality data. We note that the reports cited herein



include positive results from different countries, suggesting that efficacy is robust across different health systems. Given the safety of convalescent plasma administration in COVID-19 patients,<sup>3,4</sup> the results of this real-time systematic review and meta-analysis provide encouragement for its continued use as a therapy and may have broad implications for the treatment of COVID-19 and design of RCTs. Importantly, many of the patients enrolled in the studies included in the present analyses received convalescent plasma transfusions later in their disease course. In this context, prior to antibiotics and effective vaccinations, convalescent plasma therapy was widely understood to be most efficacious very early in the course of hospitalizations.<sup>2,160</sup> As a result, our analysis may underestimate the mortality reduction achievable through early administration of high-titer convalescent plasma for COVID-19.

## **Conclusion**

This real-time systematic review and meta-analysis of contemporaneous studies highlights that the mortality rate of transfused COVID-19 patients was lower than that of non-transfused COVID-19 patients and suggests that early transfusion of high-titer plasma represents the optimal use scenario to reduce the risk of mortality among patients with COVID-19. These results favor the efficacy of convalescent plasma as a COVID-19 therapeutic agent.

## References

1. Luke TC, Kilbane EM, Jackson JL, Hoffman SL. Meta-analysis: convalescent blood products for Spanish influenza pneumonia: a future H5N1 treatment? *Ann Intern Med.* 2006;145(8):599-609.
2. Casadevall A, Pirofski L. The convalescent sera option for containing COVID-19. *J Clin Invest.* 2020;130(4):1545-1548.
3. Joyner MJ, Bruno KA, Klassen SA, et al. Safety Update: COVID-19 Convalescent Plasma in 20,000 Hospitalized Patients. *Mayo Clin Proc.* 2020;95(9):1888-1897. doi:10.1016/j.mayocp.2020.06.028
4. Joyner M, Wright RS, Fairweather D, et al. Early Safety Indicators of COVID-19 Convalescent Plasma in 5,000 Patients. *J Clin Invest.* Published online 2020.
5. Bloch EM, Shoham S, Casadevall A, et al. Deployment of convalescent plasma for the prevention and treatment of COVID-19. *J Clin Invest.* 2020;130(6):2757-2765. doi:10.1172/JCI138745
6. American Association of Blood Banks, America's Blood Centers, American Red Cross. Joint Statement: Blood Community Encourages Individuals to Donate Blood, Convalescent Plasma During National Blood Donor Month and Beyond. Published 2021. [https://mk0americasbloodf2jd.kinstacdn.com/wp-content/uploads/2021/01/NBDM\\_Joint-Statement\\_Jan-2021-1.15.21\\_final.pdf](https://mk0americasbloodf2jd.kinstacdn.com/wp-content/uploads/2021/01/NBDM_Joint-Statement_Jan-2021-1.15.21_final.pdf)
7. (JHU) Center for Systems and Engineering (CSSE) at Johns Hopkins University. COVID-19 Dashboard. Published 2021. <https://coronavirus.jhu.edu/map.html>
8. United States Food and Drug Administration. Emergency Use Authorization (EUA) for emergency use of bamlanivimab for the treatment of mild to moderate COVID-19. Published 2020. <https://www.fda.gov/media/143602/download>
9. United States Food and Drug Administration. Emergency Use Authorization (EUA) for emergency use of Moderna COVID-19 Vaccine. Published 2020. <https://www.fda.gov/media/144636/download>
10. Piechotta V, Chai KL, Valk SJ, et al. Convalescent plasma or hyperimmune immunoglobulin for people with COVID-19: a living systematic review. *Cochrane Database Syst Rev.* 2020;(7).
11. Chai KL, Valk SJ, Piechotta V, et al. Convalescent plasma or hyperimmune immunoglobulin for people with COVID-19: a living systematic review. *Cochrane Database Syst Rev.* 2020;(10).
12. Liu Z. Errors in Trial of Effect of Convalescent Plasma Therapy on Time to Clinical Improvement in Patients with Severe and Life-threatening COVID-19. *JAMA - J Am Med Assoc.* 2020;324(5):518-519. doi:10.1001/jama.2020.12607
13. Gharbharan A, Jordans CCE, GeurtsvanKessel C, et al. Convalescent Plasma for COVID-19. A randomized clinical trial. *medRxiv.* Published online 2020.
14. Salazar E, Christensen PA, Graviss EA, et al. Treatment of COVID-19 Patients with Convalescent Plasma Reveals a Signal of Significantly Decreased Mortality. *Am J Pathol.* Published online 2020.
15. Hartman W, Hess AS, Connor JP. Hospitalized COVID-19 patients treated with Convalescent Plasma in a mid-size city in the midwest. *Transl Med Commun.* 2020;5(1).
16. Abolghasemi H, Eshghi P, Cheraghali AM, et al. Clinical efficacy of convalescent plasma for treatment of COVID-19 infections: Results of a multicenter clinical study. *Transfus Apher Sci.* 2020;59(5):102875. doi:10.1016/j.transci.2020.102875
17. Rasheed AM, Fatak DF, Hashim HA, et al. The therapeutic effectiveness of Convalescent plasma therapy on treating COVID-19 patients residing in respiratory care units in hospitals in Baghdad, Iraq. *medRxiv.* 2020;28(3):357-366. doi:10.1101/2020.06.24.20121905
18. Avendano-Sola C, Ramos-Martinez A, Munez-Rubio E, et al. Convalescent Plasma for COVID-19: A multicenter, randomized clinical trial. *medRxiv.* Published online 2020.
19. Sterne JAC, Savović J, Page MJ, et al. RoB 2: a revised tool for assessing risk of bias in randomised trials.

- bmj*. 2019;366.
20. Higgins JPT, Savović J, Page M, Elbers R, Sterne J. Chapter 8: Assessing risk of bias in a randomized trial. In: Higgins JPT, Thomas J, Chandler J, et al., eds. *Cochrane Handbook for Systematic Reviews of Interventions Version 6.1.* ; 2020. [www.training.cochrane.org/handbook](http://www.training.cochrane.org/handbook)
  21. Wells G, Shea B, O'Connell D, et al. The Newcastle-Ottawa scale (NOS) for assessing the quality of nonrandomized studies in meta-analysis. *Ottawa, Ontario Ottawa Heal Res Inst*. Published online 2011.
  22. Murad MH, Sultan S, Haffar S, Bazerbachi F. Methodological quality and synthesis of case series and case reports. *BMJ evidence-based Med*. 2018;23(2):60-63.
  23. DerSimonian R, Laird N. Meta-analysis in clinical trials *Control Clin Trials*. 1986. 177:10.
  24. Schunemann H, Vist G, Higgins JPT, et al. Chapter 15: Interpreting results and drawing conclusions. In: *Cochrane Handbook for Systematic Reviews of Interventions Version 6.1.* ; 2020. <https://training.cochrane.org/handbook/current/chapter-15#section-15-4>
  25. Schunemann H, Higgins J, Vist G, et al. Chapter 14: Completing 'Summary of findings' tables and grading the certainty of the evidence. In: Higgins JPT, Thomas J, Chandler J, et al., eds. *Cochrane Handbook for Systematic Reviews of Interventions Version 6.1*. Cochrane; 2020. [www.training.cochrane.org/handbook](http://www.training.cochrane.org/handbook)
  26. Rasheed AM, Fatak DF, Hashim HA, et al. The therapeutic potential of Convalescent plasma therapy on treating critically-ill COVID-19 patients residing in respiratory care units in hospitals in Baghdad, Iraq. *Le Infez Med*. 2020;28(PG-357-366):357-366. NS -
  27. AlQahtani M, Abdulrahman A, AlMadani A, et al. Randomized controlled trial of convalescent plasma therapy against standard therapy in patients with severe COVID-19 disease. *medRxiv*. Published online 2020.
  28. Libster R, Pérez Marc G, Wappner D, et al. Early High-Titer Plasma Therapy to Prevent Severe Covid-19 in Older Adults. *N Engl J Med*. Published online 2021.
  29. Li L, Zhang W, Hu Y, et al. Effect of Convalescent Plasma Therapy on Time to Clinical Improvement in Patients With Severe and Life-threatening COVID-19: A Randomized Clinical Trial. *JAMA*. 2020;(PG-). NS -
  30. Ray Y, Paul SR, Bandopadhyay P, et al. Clinical and immunological benefits of convalescent plasma therapy in severe COVID-19: insights from a single center open label randomised control trial. *medRxiv*. Published online 2020.
  31. Simonovich VA, Burgos Pratz LD, Scibona P, et al. A Randomized Trial of Convalescent Plasma in Covid-19 Severe Pneumonia. *N Engl J Med*. Published online 2020.
  32. Agarwal A, Mukherjee A, Kumar G, Chatterjee P, Bhatnagar T, Malhotra P. Convalescent plasma in the management of moderate covid-19 in adults in India: Open label phase II multicentre randomised controlled trial (PLACID Trial). *BMJ*. 2020;371. doi:10.1136/bmj.m3939
  33. Bajpai M, Maheshwari A, Chabra K, et al. Efficacy of Convalescent Plasma Therapy compared to Fresh Frozen Plasma in Severely ill COVID-19 Patients: A Pilot Randomized Controlled Trial. *medRxiv*. Published online 2020.
  34. Duan K, Liu B, Li C, et al. Effectiveness of convalescent plasma therapy in severe COVID-19 patients. *Proc Natl Acad Sci U S A*. 2020;117(17):9490-9496. doi:10.1073/pnas.2004168117
  35. Salazar E, Christensen PA, Graviss EA, et al. Significantly decreased mortality in a large cohort of COVID-19 patients transfused early with convalescent plasma containing high titer anti-SARS-CoV-2 spike protein IgG. *Am J Pathol*. Published online 2020.
  36. Xia X, Li K, Wu L, et al. Improved Clinical Symptoms and Mortality on Severe/Critical COVID-19 Patients Utilizing Convalescent Plasma Transfusion. *Blood*. Published online 2020.
  37. AlShehry N, Zaidi SZA, AlAskar A, et al. Safety and Efficacy of Convalescent Plasma for Severe COVID-19: Interim Report of a Multicenter Phase II Study from Saudi Arabia. *Saudi J Med Med Sci*. 9(1):16.

38. Budhiraja S, Dewan A, Aggarwal R, et al. Effectiveness of Convalescent Plasma Therapy in Indian Patients with COVID-19. Published online 2020.
39. ah Yoon H, Bartash R, Gendlina I, et al. Treatment of Severe COVID-19 with Convalescent Plasma in the Bronx, NYC. *medRxiv*. Published online 2020.
40. Salazar E, Christensen PA, Graviss EA, et al. Treatment of Coronavirus Disease 2019 Patients with Convalescent Plasma Reveals a Signal of Significantly Decreased Mortality. *Am J Pathol*. 2020;190(11):2290-2303. doi:10.1016/j.ajpath.2020.08.001
41. Rogers R, Shehadeh F, Mylona E, et al. Convalescent plasma for patients with severe COVID-19: a matched cohort study. *medRxiv*. Published online 2020.
42. Altuntas F, Ata N, Yigenoglu TN, et al. Convalescent plasma therapy in patients with COVID-19. *Transfus Apher Sci*. Published online 2020:102955.
43. Klapholz M, Pentakota SR, Zertuche J-P, et al. Matched Cohort Study of Convalescent COVID-19 Plasma (CCP) Treatment in Severely or Life Threateningly Ill COVID-19 Patients. *Open Forum Infect Dis*. Published online January 4, 2021. doi:10.1093/ofid/ofab001
44. Klein MN, Wang EW, Zimand P, et al. Kinetics of SARS-CoV-2 antibody responses pre-and post-COVID-19 convalescent plasma transfusion in patients with severe respiratory failure: an observational case-control study. *medRxiv*. Published online 2020.
45. Perotti C, Baldanti F, Bruno R, et al. Covid-19 plasma task force. Mortality reduction in 46 severe Covid-19 patients treated with hyperimmune plasma. A proof of concept single arm multicenter trial. *Haematologica*. Published online 2020.
46. Moniuszko-Malinowska A, Czupryna P, Zarębska-Michaluk D, et al. Convalescent Plasma Transfusion for the Treatment of COVID-19—Experience from Poland: A Multicenter Study. *J Clin Med*. 2021;10(1):28.
47. Omrani AS, Zaqout A, Baiou A, et al. Convalescent plasma for the treatment of patients with severe coronavirus disease 2019: A preliminary report. *J Med Virol*. Published online 2020.
48. Hegerova L, Gooley TA, Sweerus KA, et al. Use of convalescent plasma in hospitalized patients with COVID-19: Case series. *Blood*. 2020;136(6):759-762. doi:10.1182/BLOOD.2020006964
49. Alsharidah S, Ayed M, Ameen RM, et al. COVID-19 Convalescent Plasma Treatment of Moderate and Severe Cases of SARS-CoV-2 Infection: A Multicenter Interventional Study. *Int J Infect Dis*. Published online 2020.
50. Zeng QL, Yu ZJ, Gou JJ, et al. Effect of Convalescent Plasma Therapy on Viral Shedding and Survival in Patients with Coronavirus Disease 2019. *J Infect Dis*. 2020;222(1):38-43. doi:10.1093/infdis/jiaa228
51. Donato M, Park S, Baker M, et al. Clinical and laboratory evaluation of patients with SARS-CoV-2 pneumonia treated with high-titer convalescent plasma: a prospective study. *medRxiv*. Published online 2020.
52. Salazar MR, Gonzalez SE, Regairaz L, et al. EFFECT OF CONVALESCENT PLASMA ON MORTALITY IN PATIENTS WITH COVID-19 PNEUMONIA. *medRxiv*. Published online 2020.
53. Liu STH, Lin HM, Baine I, et al. Convalescent plasma treatment of severe COVID-19: a propensity score-matched control study. *Nat Med*. 2020;26(11):1708-1713. doi:10.1038/s41591-020-1088-9
54. Joyner MJ, Carter RE, Senefeld JW, et al. Convalescent plasma antibody levels and the risk of death from covid-19. *N Engl J Med*. Published online 2021.
55. Maor Y, Cohen D, Paran N, et al. Compassionate use of convalescent plasma for treatment of moderate and severe pneumonia in COVID-19 patients and association with IgG antibody levels in donated plasma. *EClinicalMedicine*. 2020;26:100525.
56. Baang JH, Smith C, Mirabelli C, et al. Prolonged Severe Acute Respiratory Syndrome Coronavirus 2 Replication in an Immunocompromised Patient. *J Infect Dis*. 2021;223(1):23-27. doi:10.1093/infdis/jiaa666

57. Balashov D, Trakhtman P, Livshits A, et al. SARS-CoV-2 convalescent plasma therapy in pediatric patient after hematopoietic stem cell transplantation. *Transfus Apher Sci*. Published online 2020:102983.
58. Bao Y, Lin SY, Cheng ZH, et al. Clinical Features of COVID-19 in a Young Man with Massive Cerebral Hemorrhage—Case Report. *Sn Compr Clin Med*. Published online 2020:1.
59. Betrains A, Godinas L, Woei-A-Jin FJSH, et al. Convalescent plasma treatment of persistent severe acute respiratory syndrome coronavirus-2 (SARS-CoV-2) infection in patients with lymphoma with impaired humoral immunity and lack of neutralising antibodies. *Br J Haematol*. Published online 2020.
60. Bhumbra S, Malin S, Kirkpatrick L, et al. Clinical Features of Critical Coronavirus Disease 2019 in Children\*. *Pediatr Crit Care Med*. 2020;21(10):E948-E953. doi:10.1097/PCC.0000000000002511
61. Ilona B, László G, Marienn R, et al. Successful administration of convalescent plasma in critically ill COVID-19 patients in Hungary: The first two cases. *Orv Hetil*. 2020;161(27):1111-1121. doi:10.1556/650.2020.31901
62. Bradfute SB, Hurwitz I, Yingling A V., et al. Severe Acute Respiratory Syndrome Coronavirus 2 Neutralizing Antibody Titers in Convalescent Plasma and Recipients in New Mexico: An Open Treatment Study in Patients With Coronavirus Disease 2019. *J Infect Dis*. 2020;222(10):1620-1628. doi:10.1093/infdis/jiaa505
63. Choudhury A, Reddy GS, Venishetty S, et al. COVID-19 in Liver Transplant Recipients-A Series with Successful Recovery. *J Clin Transl Hepatol*. 2020;8(4):1-7.
64. Christensen J, Kumar D, Moinuddin I, et al. Coronavirus Disease 2019 Viremia, Serologies, and Clinical Course in a Case Series of Transplant Recipients. In: *Transplantation Proceedings*. Vol 52. Elsevier; 2020:2637-2641. doi:10.1016/j.transproceed.2020.08.042
65. Çınar OE, Sayınalp B, Karakulak EA, et al. Covalascent (immune) plasma treatment in a myelodysplastic COVID-19 patient with disseminated Tuberculosis. *Transfus Apher Sci*. Published online 2020:102821.
66. Clark E, Guilpain P, Filip IL, et al. Convalescent plasma for persisting COVID-19 following therapeutic lymphocyte depletion: a report of rapid recovery. *Br J Haematol*. 2020;190(3):e154-e156. doi:10.1111/bjh.16981
67. Diorio C, Anderson EM, McNerney KO, et al. Convalescent plasma for pediatric patients with SARS-CoV-2-associated acute respiratory distress syndrome. *Pediatr Blood Cancer*. 2020;67(11):e28693. doi:10.1002/pbc.28693
68. Donzelli M, Ippolito M, Catalisano G, et al. Prone positioning and convalescent plasma therapy in a critically ill pregnant woman with COVID-19. *Clin case reports*. Published online 2020.
69. Dulipsingh L, Ibrahim D, Schaefer EJ, et al. SARS-CoV-2 serology and virology trends in donors and recipients of convalescent plasma. *Transfus Apher Sci*. 2020;59(6):102922. doi:10.1016/j.transci.2020.102922
70. Easterlin MC, De Beritto T, Yeh AM, Wertheimer FB, Ramanathan R. Extremely Preterm Infant Born to a Mother With Severe COVID-19 Pneumonia. *J Investig Med High Impact Case Reports*. 2020;8:2324709620946621. doi:10.1177/2324709620946621
71. Einollahi B, Cegolon L, Abolghasemi H, et al. A patient affected by critical COVID-19 pneumonia, successfully treated with convalescent plasma. *Transfus Apher Sci*. 2020;59(6):102995. doi:10.1016/j.transci.2020.102995
72. Erkurt MA, Sarici A, Berber İ, Kuku İ, Kaya E, Özgül M. Life-saving effect of convalescent plasma treatment in covid-19 disease: Clinical trial from eastern Anatolia. *Transfus Apher Sci*. 2020;59(5):102867. doi:10.1016/j.transci.2020.102867
73. Ferrari S, Caprioli C, Weber A, Rambaldi A, Lussana F. Convalescent hyperimmune plasma for chemo-immunotherapy induced immunodeficiency in COVID-19 patients with hematological malignancies. *Leuk Lymphoma*. Published online 2021:1-9.
74. Figlerowicz M, Mania A, Lubarski K, et al. First case of convalescent plasma transfusion in a child with COVID-19-associated severe aplastic anemia. *Transfus Apher Sci*. 2020;59(5):102866.

doi:10.1016/j.transci.2020.102866

75. Fisher DL, Pavel A, Malnick S. Rapid recovery of taste and smell in a patient with SARS-CoV-2 following convalescent plasma therapy. *QJM An Int J Med*. Published online 2021.
76. Fung M, Nambiar A, Pandey S, et al. Treatment of Immunocompromised COVID-19 patients with Convalescent Plasma. *Transpl Infect Dis*. Published online 2020.
77. Gazitúa R, Briones JL, Selman C, et al. Convalescent Plasma in COVID-19. Mortality-Safety First Results of the Prospective Multicenter FALP 001-2020 Trial. *medRxiv*. Published online 2020.
78. GEMİCİ A, BİLGİN H, ERDOĞAN C, et al. A single center cohort of 40 severe COVID-19 patients who were treated with convalescent plasma. *Turkish J Med Sci*. 2020;50(8):1781-1785. doi:10.3906/sag-2009-77
79. González SE, Regairaz L, Ferrando NS, González Martínez V V, Salazar MR, Estenssoro E. Convalescent plasma therapy in COVID-19 patients, in the Province of Buenos Aires. *Medicina (B Aires)*. 2020;80(5):417-424.
80. Hahn M, Condori MEH, Totland A, Kristoffersen EK, Hervig TA. Patient with severe covid-19 treated with convalescent plasma. *Pasient med alvorlig covid-19 behandlet med rekonvalesensplasma*. 2020;140(12). doi:<https://dx.doi.org/10.4045/tidsskr.20.0501>
81. Hartman WR, Hess AS, Connor J. Use of COVID-19 Convalescent Plasma as Prophylaxis in a Patient with New Onset ALL. *Clin Oncol Case Reports*. 2020;4(1).
82. Hatzl S, Eisner F, Schilcher G, et al. Response to “COVID-19 in persons with haematological cancers.” *Leukemia*. 2020;34:2265-2270.
83. Hovey JG, Tolbert D, Howell D. Burton’s Agammaglobulinemia and COVID-19. *Cureus*. 2020;12(11).
84. Hu X, Hu C, Jiang D, et al. Effectiveness of Convalescent Plasma Therapy for COVID-19 Patients in Hunan, China. *Dose-Response*. 2020;18(4):1559325820979921.
85. Huang S, Shen C, Xia C, Huang X, Fu Y, Tian L. A retrospective study on the effects of convalescent plasma therapy in 24 patients diagnosed with covid-19 pneumonia in february and march 2020 at 2 centers in wuhan, china. *Med Sci Monit*. 2020;26:e928755. doi:10.12659/MSM.928755
86. Abid MB, Chhabra S, Buchan B, et al. Bronchoalveolar lavage-based COVID-19 testing in patients with cancer. *Hematol Oncol Stem Cell Ther*. Published online 2020.
87. Hueso T, Poudroux C, Péré H, et al. Convalescent plasma therapy for B-cell depleted patients with protracted COVID-19 disease. *Blood*. 2020;(PG-). NS -
88. Im JH, Nahm CH, Baek JH, Kwon HY, Lee JS. Convalescent plasma therapy in coronavirus disease 2019: A case report and suggestions to overcome obstacles. *J Korean Med Sci*. 2020;35(26). doi:10.3346/JKMS.2020.35.E239
89. Jaiswal V, Nasa P, Raouf M, et al. Therapeutic plasma exchange followed by convalescent plasma transfusion in critical COVID-19—An exploratory study. *Int J Infect Dis*. 2020;102:332-334.
90. Jamir I, Lohia P, Pande RK, Setia R, Singhal AK, Chaudhary A. Convalescent plasma therapy and remdesivir duo successfully salvaged an early liver transplant recipient with severe COVID-19 pneumonia. *Ann Hepato-biliary-pancreatic Surg*. 2020;24(4):526.
91. Jamous F, Meyer N, Buus D, et al. Critical Illness Due to Covid-19: A Description of the Surge in a Single Center in Sioux Falls. *S D Med*. 2020;73(7):312-317.
92. Ji F, Liu W, Hao D, et al. Use of convalescent plasma therapy in Eight mild COVID-19 patients. *New microbes new Infect*. Published online 2020:100814.
93. Jiang J, Miao Y, Zhao Y, et al. Convalescent plasma therapy: Helpful treatment of COVID-19 in a kidney transplant recipient presenting with severe clinical manifestations and complex complications. *Clin Transplant*. 2020;34(9):e14025. doi:10.1111/ctr.14025

94. Jin C, Gu J, Yuan Y, et al. Treatment of 6 COVID-19 Patients with Convalescent Plasma. *medRxiv*. Published online 2020.
95. Jin H, Reed JC, Liu STH, et al. Three patients with X-linked agammaglobulinemia hospitalized for COVID-19 improved with convalescent plasma. *J Allergy Clin Immunol Pract*. 2020;8(10):3594-3596.e3. doi:10.1016/j.jaip.2020.08.059
96. Karataş A, İnkaya AÇ, Demiroğlu H, et al. Prolonged viral shedding in a lymphoma patient with COVID-19 infection receiving convalescent plasma. *Transfus Apher Sci*. Published online 2020:102871.
97. Ahn JY, Sohn Y, Lee SH, et al. Use of convalescent plasma therapy in two covid-19 patients with acute respiratory distress syndrome in Korea. *J Korean Med Sci*. 2020;35(14). doi:10.3346/JKMS.2020.35.E149
98. Katz-Greenberg G, Yadav A, Gupta M, et al. Outcomes of COVID-19-positive kidney transplant recipients: A single-center experience. *Clin Nephrol*. Published online 2020.
99. Kong Y, Cai C, Ling L, et al. Successful treatment of a centenarian with coronavirus disease 2019 (COVID-19) using convalescent plasma. *Transfus Apher Sci*. 2020;59(5):102820. doi:10.1016/j.transci.2020.102820
100. Lancman G, Mascarenhas J, Bar-Natan M. Severe COVID-19 virus reactivation following treatment for B cell acute lymphoblastic leukemia. *J Hematol Oncol*. 2020;13(1):1-3. doi:10.1186/s13045-020-00968-1
101. Lima B, Gibson GT, Vullaganti S, et al. COVID-19 in recent heart transplant recipients: Clinicopathologic features and early outcomes. *Transpl Infect Dis*. 2020;22(5):e13382. doi:10.1111/tid.13382
102. Luetkens T, Metcalf R, Planelles V, et al. Successful transfer of anti-SARS-CoV-2 immunity using convalescent plasma in an MM patient with hypogammaglobulinemia and COVID-19. *Blood Adv*. 2020;4(19):4864-4868. doi:10.1182/BLOODADVANCES.2020002595
103. London J, Boutboul D, Lacombe K, et al. Severe COVID-19 in Patients with B Cell A lymphocytosis and Response to Convalescent Plasma Therapy. *J Clin Immunol*. Published online 2020:1-6.
104. Lubnow M, Schmidt B, Fleck M, et al. Secondary hemophagocytic lymphohistiocytosis and severe liver injury induced by hepatic SARS-CoV-2 infection unmasking Wilson's disease: balancing immunosuppression. *Int J Infect Dis*.
105. Malsy J, Veletzky L, Heide J, et al. Sustained response after remdesivir and convalescent plasma therapy in a B-cell depleted patient with protracted COVID-19. *Clin Infect Dis*. Published online 2020.
106. Martinez-Resendez MF, Castilleja-Leal F, Torres-Quintanilla A, et al. Initial experience in Mexico with convalescent plasma in COVID-19 patients with severe respiratory failure, a retrospective case series. *medRxiv*. Published online 2020.
107. Mehta SA, Rana MM, Motter JD, et al. Incidence and Outcomes of COVID-19 in Kidney and Liver Transplant Recipients With HIV: Report From the National HOPE in Action Consortium. *Transplantation*. 2021;105(1):216-224. doi:10.1097/tp.0000000000003527
108. Anderson J, Schauer J, Bryant S, Graves CR. The use of convalescent plasma therapy and remdesivir in the successful management of a critically ill obstetric patient with novel coronavirus 2019 infection: A case report. *Case Reports Women's Heal*. Published online 2020:e00221.
109. Milošević I, Jovanović J, Stevanovic O. Atypical course of COVID-19 in patient with Bruton agammaglobulinemia. *J Infect Dev Ctries*. 2020;14(11):1248-1251. doi:10.3855/jidc.13840
110. Mira E, Yarce OA, Ortega C, et al. Rapid recovery of a SARS-CoV-2-infected X-linked agammaglobulinemia patient after infusion of COVID-19 convalescent plasma. *J Allergy Clin Immunol Pract*. 2020;8(8):2793-2795. doi:10.1016/j.jaip.2020.06.046
111. Moore JL, Ganapathiraju P V., Kurtz CP, Wainscoat B. A 63-year-old woman with a history of nonhodgkin lymphoma with persistent sars-cov-2 infection who was seronegative and treated with convalescent plasma. *Am J Case Rep*. 2020;21:1-5. doi:10.12659/AJCR.927812
112. Naeem S, Gohh R, Bayliss G, et al. Successful recovery from COVID-19 in three kidney transplant recipients

- who received convalescent plasma therapy. *Transpl Infect Dis*. Published online 2020:e13451.
113. Niu A, McDougal A, Ning B, et al. COVID-19 in allogeneic stem cell transplant: high false-negative probability and role of CRISPR and convalescent plasma. *Bone Marrow Transplant*. 2020;55(12):2354-2356. doi:10.1038/s41409-020-0972-8
  114. Olivares-Gazca JC, Priesca-Marín JM, Ojeda-Laguna M, et al. Infusion of convalescent plasma is associated with clinical improvement in critically ill patients with COVID-19: a pilot study. *Rev Invest Clin*. 2020;72(PG-159-164):159-164. NS -
  115. Pal P, Ibrahim M, Niu A, et al. Safety and efficacy of COVID-19 convalescent plasma in severe pulmonary disease: A report of 17 patients. *Transfus Med*. Published online 2020.
  116. Peng F, Tu L, Yang Y, et al. Management and Treatment of COVID-19: The Chinese Experience. *Can J Cardiol*. 2020;36(6):915-930. doi:10.1016/j.cjca.2020.04.010
  117. Ragab D, Salah-Eldin H, Afify M, Soliman W, Badr MH. A case of COVID-19, with cytokine storm, treated by consecutive use of therapeutic plasma exchange followed by convalescent plasma transfusion: A case report. *J Med Virol*. Published online 2020.
  118. Rahman MH, Akter R, Behl T, et al. COVID-19 Outbreak and Emerging Management through Pharmaceutical Therapeutic Strategy. *Curr Pharm Des*. 2020;26(41):5224-5240. doi:10.2174/1381612826666200713174140
  119. Antony SJ, Singh J, de Jesus M, Lance J. Early use of tocilizumab in respiratory failure associated with acute COVID-19 pneumonia in recipients with solid organ transplantation. *IDCases*. 2020;21:e00888.
  120. Rizvi S, Danic M, Silver M, LaBond V. Cytosorb filter: An adjunct for survival in the COVID-19 patient in cytokine storm? a case report. *Hear Lung*. 2021;50(1):44-50. doi:10.1016/j.hrtlng.2020.09.007
  121. Rodriguez Z, Shane AL, Verkerke H, et al. COVID-19 convalescent plasma clears SARS-CoV-2 refractory to remdesivir in an infant with congenital heart disease. *Blood Adv*. 2020;4(18):4278-4281. doi:10.1182/BLOODADVANCES.2020002507
  122. Schwartz SP, Walker TC, Kihlstrom M, et al. Extracorporeal Membrane Oxygenation for COVID-19-Associated Multisystem Inflammatory Syndrome in a 5-year-old. *Am Surg*. Published online 2020:0003134820983198.
  123. Shankar R, Radhakrishnan N, Dua S, et al. Convalescent plasma to aid in recovery of COVID-19 pneumonia in a child with acute lymphoblastic leukemia. *Transfus Apher Sci*. Published online 2020:102956.
  124. Shen C, Wang Z, Zhao F, et al. Treatment of 5 Critically Ill Patients with COVID-19 with Convalescent Plasma. *JAMA - J Am Med Assoc*. 2020;323(16):1582-1589. doi:10.1001/jama.2020.4783
  125. Szwebel T-A, Veyer D, Robillard N, et al. Usefulness of Plasma SARS-CoV-2 RNA Quantification by Droplet-based Digital PCR to Monitor Treatment Against COVID-19 in a B-cell Lymphoma Patient. *Stem cell Rev reports*:1-4.
  126. Tan L, Kang X, Zhang B, et al. A special case of COVID-19 with long duration of viral shedding for 49 days. *MedRxiv*. Published online 2020.
  127. Tremblay D, Seah C, Schneider T, et al. Convalescent Plasma for the Treatment of Severe COVID-19 Infection in Cancer Patients. *Cancer Med*. 2020;9(22):8571-8578. doi:10.1002/cam4.3457
  128. Trimarchi H, Gianserra R, Lampo M, Monkowski M, Lodolo J. Eculizumab, SARS-CoV-2 and atypical hemolytic uremic syndrome. Published online 2020.
  129. Van Damme KFA, Tavernier S, Van Roy N, et al. Case Report: Convalescent Plasma, a Targeted Therapy for Patients with COVID and Severe COVID-19. *Front Immunol*. 2020;11:596761. doi:10.3389/fimmu.2020.596761
  130. Anupama BK, Thapa SS, Amzuta I. Transient Cardiomyopathy in a Patient With Coronavirus Disease-2019. *J Investig Med High Impact Case Reports*. 2020;8:2324709620947577. doi:10.1177/2324709620947577



131. van Oers NSC, Hanners NW, Sue P, et al. SARS-CoV-2 infection associated with hepatitis in an infant with X-linked severe combined immunodeficiency. *Clin Immunol.*:108662.
132. Vlachogianni G, Hassapoulou-Matamis H, Politis C, Fylaki E, Mentis A. A case of COVID-19 Convalescent Plasma Donation in Greece: Directed donation for compassionate use in the donor's critically ill father. *Transfus Clin Biol.* 2020;27(4):269-270. doi:10.1016/j.tracl.2020.09.001
133. Wang M, Yang X, Yang F, et al. Convalescent plasma therapy in critically ill coronavirus disease 2019 patients with persistently positive nucleic acid test, case series report. *Medicine (Baltimore).* 2020;99(36):e21596. doi:10.1097/MD.0000000000021596
134. Wang B, Van Oekelen O, Mouhieddine T, et al. A tertiary center experience of multiple myeloma patients with COVID-19: lessons learned and the path forward. *medRxiv.* Published online 2020.
135. Wei B, Hang X, Xie Y, et al. Long-term positive severe acute respiratory syndrome coronavirus 2 ribonucleic acid and therapeutic effect of antivirals in patients with coronavirus disease: Case reports. *Rev Soc Bras Med Trop.* 2020;53:1-4. doi:10.1590/0037-8682-0372-2020
136. Wright Z, Bersabe A, Eden R, Cap A. Successful use of COVID-19 convalescent plasma in a patient recently treated for follicular lymphoma. *Clin Lymphoma Myeloma Leuk.* Published online 2020.
137. Xu X, Ong YK, Wang DY. Role of adjunctive treatment strategies in COVID-19 and a review of international and national clinical guidelines. *Mil Med Res.* 2020;7(1):22. doi:10.1186/s40779-020-00251-x
138. Yang B, Yang J, Zhou L, et al. Inflammatory cytokine depletion in severe coronavirus disease 2019 infectious pneumonia: A case report. *Medicine (Baltimore).* 2020;99(49):e23449. doi:10.1097/MD.0000000000023449
139. Ye M, Fu D, Ren Y, et al. Treatment with convalescent plasma for COVID-19 patients in Wuhan, China. *J Med Virol.* 2020;92(10):1890-1901. doi:10.1002/jmv.25882
140. Stephanie GY, Rogers AW, Saharia A, et al. Early experience with COVID-19 and solid organ transplantation at a US high-volume transplant center. *Transplantation.* 2020;104(11):2208.
141. Avanzato VA, Matson MJ, Seifert SN, et al. Case Study: Prolonged Infectious SARS-CoV-2 Shedding from an Asymptomatic Immunocompromised Individual with Cancer. *Cell.* 2020;183(7):1901-1912.e9. doi:10.1016/j.cell.2020.10.049
142. Yokoyama APH, Wendel S, Bonet-Bub C, et al. Impact of Convalescent Plasma Transfusion (CCP) In Patients With Previous Circulating Neutralizing Antibodies (nAb) to COVID-19. *medRxiv.* Published online 2020.
143. Zeng H, Wang D, Nie J, et al. The efficacy assessment of convalescent plasma therapy for COVID-19 patients: a multi-center case series. *Signal Transduct Target Ther.* 2020;5(1):219. doi:10.1038/s41392-020-00329-x
144. Zhang B, Liu S, Tan T, et al. Treatment With Convalescent Plasma for Critically Ill Patients With Severe Acute Respiratory Syndrome Coronavirus 2 Infection. *Chest.* 2020;158(1):e9-e13. doi:10.1016/j.chest.2020.03.039
145. Zhang LL, Liu Y, Guo YG, et al. Convalescent Plasma Rescued a Severe COVID-19 Patient with Chronic Myeloid Leukemia Blast Crisis and Myelofibrosis. *Turkish J Haematol Off J Turkish Soc Haematol.* Published online 2020.
146. Zhang LB, Pang RR, Qiao QH, et al. Successful recovery of COVID-19-associated recurrent diarrhea and gastrointestinal hemorrhage using convalescent plasma. *Mil Med Res.* 2020;7(1):45. doi:10.1186/s40779-020-00273-5
147. Zhang L, Pang R, Xue X, et al. Anti-SARS-CoV-2 virus antibody levels in convalescent plasma of six donors who have recovered from COVID-19. *Ageing (Albany NY).* 2020;12(8):6536-6542. doi:10.18632/AGING.103102
148. US Food and Drug Administration (FDA). Updated Evidence to Support the Emergency Use of COVID-19 Convalescent Plasma (as of 9/23/2020). Published 2020. <https://www.fda.gov/media/142386/download>

149. Joyner MJ, Senefeld JW, Klassen SA, et al. Effect of convalescent plasma on mortality among hospitalized patients with COVID-19: initial three-month experience. *MedRxiv*. Published online 2020.
150. Implications T, Pompidou G, Hospital CS. Convalescent plasma therapy for B-cell depleted patients with protracted COVID-19 disease. *Blood*. Published online 2021.
151. Senefeld J, Klassen SA, Ford SK, et al. Therapeutic use of convalescent plasma in COVID-19 patients with immunodeficiency: A systematic review. *medRxiv*. Published online 2020.
152. Murad MH. Clinical practice guidelines: a primer on development and dissemination. In: *Mayo Clinic Proceedings*. Vol 92. Elsevier; 2017:423-433.
153. Cheng Y, Wong R, Soo YOY, et al. Use of convalescent plasma therapy in SARS patients in Hong Kong. *Eur J Clin Microbiol Infect Dis*. 2005;24(1):44-46.
154. Hung IFN, To KKW, Lee C-K, et al. Convalescent plasma treatment reduced mortality in patients with severe pandemic influenza A (H1N1) 2009 virus infection. *Clin Infect Dis*. 2011;52(4):447-456.
155. Robbiani DF, Gaebler C, Muecksch F, Lorenzi JCC, Wang Z, Cho A. Convergent antibody responses to SARS-CoV-2 in convalescent individuals. *Nature* [Internet]. 2020.
156. Klein SL, Pekosz A, Park HS, et al. Sex, age, and hospitalization drive antibody responses in a COVID-19 convalescent plasma donor population. *medRxiv*. Published online 2020. doi:10.1101/2020.06.26.20139063
157. Imai M, Iwatsuki-Horimoto K, Hatta M, et al. Syrian hamsters as a small animal model for SARS-CoV-2 infection and countermeasure development. *Proc Natl Acad Sci U S A*. 2020;117(28):16587-16595. doi:10.1073/pnas.2009799117
158. Sun J, Zhuang Z, Zheng J, et al. Generation of a Broadly Useful Model for COVID-19 Pathogenesis, Vaccination, and Treatment. *Cell*. 2020;182(3):734-743.e5. doi:10.1016/j.cell.2020.06.010
159. Bandopadhyay P, Rozario RD, Lahiri A, et al. Nature and dimensions of the systemic hyper-inflammation and its attenuation by convalescent plasma in severe COVID-19. *J Infect Dis*. Published online 2021.
160. Casadevall A, Scharff MD. Return to the past: the case for antibody-based therapies in infectious diseases. *Clin Infect Dis*. 1995;21(1):150-161.

**Acknowledgements:** The authors express their gratitude to convalescent plasma donors.

**Author contributions:** SAK, JWS, MJJ, AC, NSP conceived and designed the study. SAK, JWS, MJJ, PWJ, CCW, REC analyzed the data and performed statistical analyses. All authors reviewed, critically revised and approved the final version of the manuscript.

**Competing Interests:** The authors declare no competing interests.

**Data availability:** The data supporting the study findings are available within the paper.

**Funding:** National Heart, Lung, and Blood Institute grant (5R35HL139854, to MJJ), the National Institute of Diabetes and Digestive and Kidney Diseases (5T32DK07352, to JWS and CCW), the Natural Sciences and Engineering Research Council of Canada (PDF-532926-2019, to SAK), the National Institutes of Health (1-F32-HL154320-01 to JWS), the National Institute of Allergy and Infectious Disease (R21 AI145356 and R21 AI152318, to DF; R01 AI1520789, to AC), and the National Heart, Lung, and Blood Institute (R01 HL059842, to AC)

**Table 1**

| Table 1   Mortality Rates among COVID-19 Patients    |                   |                     |              |           |          |              |           |            |        |             |
|------------------------------------------------------|-------------------|---------------------|--------------|-----------|----------|--------------|-----------|------------|--------|-------------|
| Study                                                | Location          | Convalescent Plasma |              |           | Control  |              |           | Statistics |        |             |
|                                                      |                   | Survivor            | Non-Survivor | Mortality | Survivor | Non-Survivor | Mortality | OR         | P      | 95% CI      |
| <b>Randomized Clinical Trials</b>                    |                   |                     |              |           |          |              |           |            |        |             |
| Avendano-Sola et al.                                 | ESP               | 38                  | 0            | 0%        | 39       | 4            | 9%        | 0.11       | 0.15   | 0.01, 2.19  |
| Rasheed et al.                                       | IRQ               | 20                  | 1            | 5%        | 20       | 8            | 29%       | 0.13       | 0.06   | 0.01, 1.09  |
| Gharbharan et al.                                    | NLD               | 37                  | 6            | 14%       | 32       | 11           | 26%       | 0.47       | 0.18   | 0.16, 1.42  |
| AlQahtani et al.                                     | BHR               | 19                  | 1            | 5%        | 18       | 2            | 10%       | 0.47       | 0.56   | 0.04, 5.69  |
| Libster et al.                                       | ARG               | 78                  | 2            | 3%        | 76       | 4            | 5%        | 0.49       | 0.41   | 0.09, 2.74  |
| Li et al.                                            | CHN               | 43                  | 8            | 16%       | 38       | 12           | 24%       | 0.59       | 0.30   | 0.22, 1.59  |
| Ray et al.                                           | IND               | 30                  | 10           | 25%       | 26       | 14           | 35%       | 0.62       | 0.33   | 0.24, 1.63  |
| Simonovich et al.                                    | ARG               | 197                 | 25           | 11%       | 93       | 12           | 11%       | 0.98       | 0.96   | 0.47, 2.04  |
| Agarwal et al.                                       | IND               | 201                 | 34           | 14%       | 198      | 31           | 14%       | 1.08       | 0.77   | 0.64, 1.83  |
| Bajpai et al.                                        | IND               | 11                  | 3            | 21%       | 14       | 1            | 7%        | 3.82       | 0.27   | 0.35, 41.96 |
| <i>Random Effects Model</i>                          |                   | 674                 | 90           | 12%       | 554      | 99           | 15%       | 0.76       | 0.14   | 0.54, 1.09  |
| <i>Random Effects Model excluding Agarwal et al.</i> |                   | 473                 | 56           | 11%       | 356      | 68           | 16%       | 0.65       | 0.04   | 0.43, 0.98  |
| <b>Matched-Control Studies</b>                       |                   |                     |              |           |          |              |           |            |        |             |
| Duan et al.                                          | CHN               | 10                  | 0            | 0%        | 7        | 3            | 30%       | 0.10       | 0.15   | 0.01, 2.28  |
| Perotti et al.                                       | ITA               | 43                  | 3            | 7%        | 16       | 7            | 30%       | 0.16       | 0.01   | 0.04, 0.69  |
| Omrani et al.                                        | QAT               | 39                  | 1            | 3%        | 35       | 5            | 13%       | 0.18       | 0.13   | 0.02, 1.61  |
| Hegerova et al.                                      | Washington, USA   | 18                  | 2            | 10%       | 14       | 6            | 30%       | 0.26       | 0.13   | 0.05, 1.49  |
| Salazar E. et al.                                    | Texas, USA        | 146                 | 6            | 4%        | 235      | 34           | 13%       | 0.28       | 0.01   | 0.12, 0.69  |
| Alsharidah et al.                                    | KWT               | 111                 | 24           | 18%       | 143      | 90           | 39%       | 0.34       | <0.001 | 0.21, 0.57  |
| Zeng Q. et al.                                       | CHN               | 1                   | 5            | 83%       | 1        | 14           | 93%       | 0.36       | 0.50   | 0.02, 6.85  |
| Donato et al.                                        | New York, USA     | 36                  | 11           | 23%       | 775      | 565          | 42%       | 0.42       | 0.01   | 0.21, 0.83  |
| Salazar M. et al.                                    | ARG               | 647                 | 221          | 25%       | 1288     | 1010         | 44%       | 0.44       | <0.001 | 0.37, 0.52  |
| Liu et al.                                           | New York, USA     | 34                  | 5            | 13%       | 118      | 38           | 24%       | 0.46       | 0.13   | 0.17, 1.25  |
| Xia et al.                                           | CHN               | 135                 | 3            | 2%        | 1371     | 59           | 4%        | 0.52       | 0.27   | 0.16, 1.67  |
| Abolghasemi et al.                                   | IRN               | 98                  | 17           | 15%       | 56       | 18           | 24%       | 0.54       | 0.10   | 0.26, 1.13  |
| AlShehry et al.                                      | SAU               | 30                  | 10           | 25%       | 78       | 46           | 37%       | 0.57       | 0.16   | 0.25, 1.26  |
| Budhiraja et al.                                     | IND               | 248                 | 85           | 26%       | 241      | 120          | 33%       | 0.69       | 0.03   | 0.50, 0.96  |
| ah Yoon et al.                                       | New York, USA     | 50                  | 23           | 32%       | 45       | 28           | 38%       | 0.74       | 0.39   | 0.37, 1.46  |
| Rogers et al.                                        | Rhode Island, USA | 56                  | 8            | 13%       | 149      | 28           | 16%       | 0.76       | 0.52   | 0.33, 1.77  |
| Altuntas et al.                                      | TUR               | 669                 | 219          | 25%       | 642      | 246          | 28%       | 0.85       | 0.15   | 0.69, 1.06  |
| Klapholz et al.                                      | New Jersey, USA   | 37                  | 10           | 21%       | 38       | 9            | 19%       | 1.14       | 0.80   | 0.42, 3.13  |
| Klein et al.                                         | Maryland, USA     | 25                  | 9            | 26%       | 26       | 8            | 24%       | 1.17       | 0.78   | 0.39, 3.51  |
| Moniuszko-Malinowska et al.                          | POL               | 49                  | 6            | 11%       | 672      | 43           | 6%        | 1.91       | 0.16   | 0.78, 4.72  |
| <i>Random Effects Model</i>                          |                   | 2482                | 668          | 21%       | 5950     | 2377         | 29%       | 0.57       | <0.001 | 0.45, 0.72  |
| <b>Overall Random Effects Model<sup>a</sup></b>      |                   | 2955                | 724          | 20%       | 6306     | 2445         | 28%       | 0.58       | <0.001 | 0.47, 0.71  |

CI, confidence interval; OR, odds ratio

<sup>a</sup> random-effects model excludes trial by Agarwal et al.

**Table 2**

| <b>Table 2   Mortality Rates among COVID-19 Patients</b> |                 |                                         |                     |                  |                                        |                     |                  |
|----------------------------------------------------------|-----------------|-----------------------------------------|---------------------|------------------|----------------------------------------|---------------------|------------------|
| <b>Study</b>                                             | <b>Location</b> | <b>Convalescent Plasma Higher Titer</b> |                     |                  | <b>Convalescent Plasma Lower Titer</b> |                     |                  |
|                                                          |                 | <b>Survivor</b>                         | <b>Non-Survivor</b> | <b>Mortality</b> | <b>Survivor</b>                        | <b>Non-Survivor</b> | <b>Mortality</b> |
| <b>Dose-Response Studies</b>                             |                 |                                         |                     |                  |                                        |                     |                  |
| Joyner et al.                                            | Minnesota, USA  | 400                                     | 115                 | 22%              | 395                                    | 166                 | 30%              |
| Maor et al.                                              | ISR             | 17                                      | 2                   | 11%              | 23                                     | 7                   | 23%              |
| <i>Dose-Response Total</i>                               |                 | 417                                     | 117                 | 22%              | 418                                    | 173                 | 29%              |

## Figure Legend

**Figure 1.** The effect of human convalescent plasma therapy on COVID-19 patient mortality. Forest plot illustrating odds ratios and 95% confidence intervals computed for each study and aggregated for each study type (DerSimonian–Laird random-effects model). Data are separated by study type with randomized clinical trials presented in blue and matched-control studies presented in orange. Odds ratios for each study type are presented in darker hues and the overall odds ratio pooled across all controlled studies is presented in green. Relative study weights are provided. The  $I^2$  values were 0 (randomized clinical trial model), 61 (matched-control study model), and 53 (overall model combining randomized clinical trial and matched-control studies). CI, confidence interval; OR, odds ratio.

<sup>a</sup> Random-effects model excludes trial by Agarwal and colleagues

Figure 1

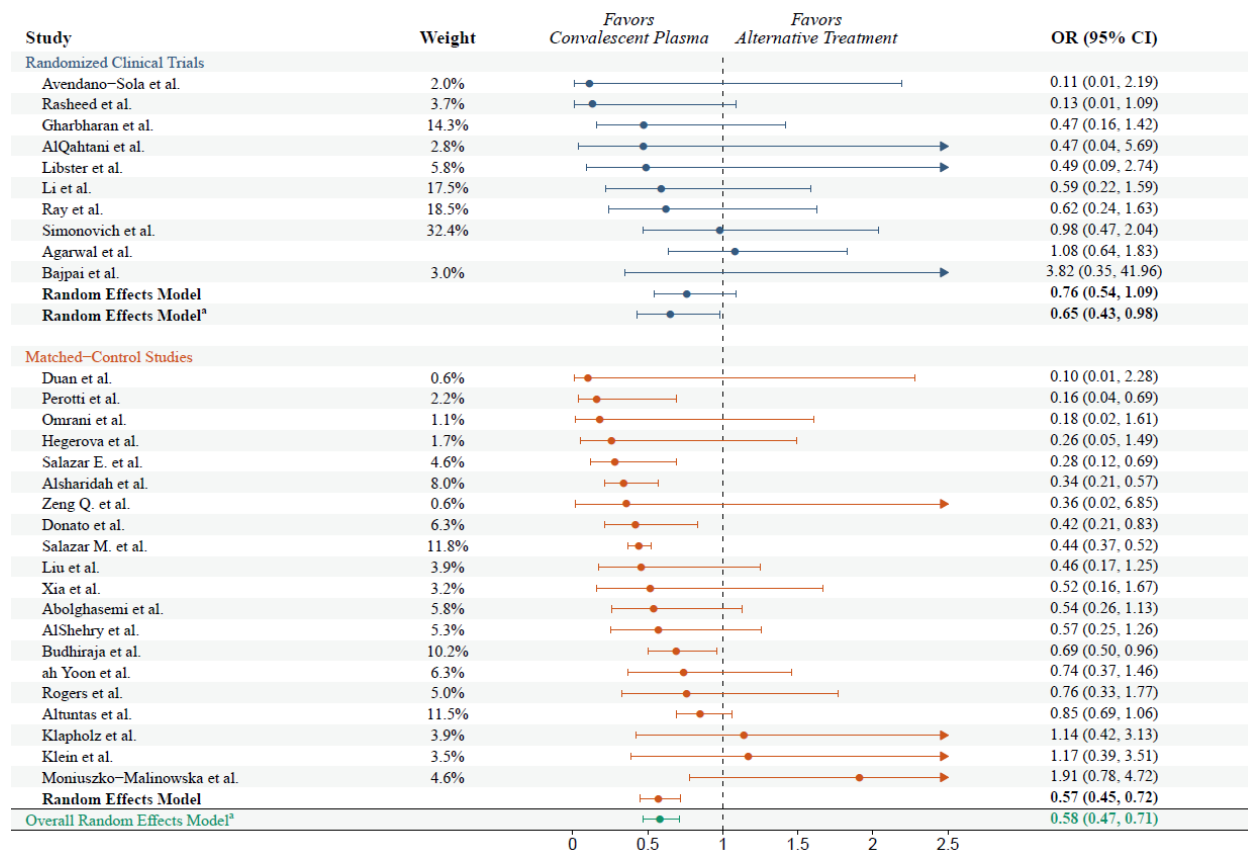

Source: https://www.medrxiv.org/content/10.1101/2020.07.29.20162917v4.full.pdf
